# Supplementary material for: Genomic insights into host and parasite interactions during intracellular infection by Toxoplasma gondii
Source: PLoS One. 2022 Sep 30;17(9):e0275226. doi: 10.1371/journal.pone.0275226 (PMC9524707; doi:10.1371/journal.pone.0275226)
Supplement: S3 Table — (XLSX) [file pone.0275226.s010.xlsx]

## Sheet: S3 Table 
JASPAR Matrix ID	name	variability	bootstrap_lower_bound	bootstrap_upper_bound	p_value	p_value_adj	U1	U2	U3	I2	I3	I avg
MA0107.1	RELA	13.7559	1.86686	14.9751	1.66e-162	1.24e-159	-10.3123	-6.58919	-11.0502	14.4797	16.6552	15.5674		U1-3	Uninfected samples
MA0101.1	REL	12.0744	1.16532	12.601	6.82e-125	2.54e-122	-9.3184	-6.64977	-9.18392	13.3928	13.7549	13.5738		I2-3	Infected samples
MA0520.1	Stat6	8.07529	1.19738	9.00107	3e-55	7.47e-53	-4.44416	-5.14288	-7.55875	8.37888	9.34709	8.86299		I avg	Mean of I2 and I3
MA0778.1	NFKB2	7.2516	0.664003	7.8942	2.24e-44	4.18e-42	-5.79697	-4.39576	-5.90357	7.02154	8.56233	7.79194
MA0083.3	SRF	6.9094	2.05583	8.29084	3.3e-40	4.92e-38	-6.57322	3.93143	-7.28677	8.31651	3.25148	5.784
MA0007.3	Ar	6.06458	1.99398	6.85274	8.44e-31	7e-29	-4.83964	6.91408	-5.98906	6.3144	-0.809441	2.75248
MA0139.1	CTCF	5.87499	1.93224	7.18104	7.34e-29	4.98e-27	-1.69698	-3.08736	-6.84529	5.21436	7.19192	6.20314
MA0727.1	NR3C2	5.84677	1.79069	6.79286	1.41e-28	8.08e-27	-5.2748	7.24925	-5.15173	5.35048	-1.18017	2.08516
MA0113.3	NR3C1	5.57314	2.17155	6.50795	6.64e-26	3.09e-24	-4.53982	6.74593	-5.68588	5.1245	-0.0990982	2.5127
MA1117.1	RELB	4.22829	1.45064	5.33228	1.09e-14	2.13e-13	-2.291	-0.973165	-4.52187	3.23502	5.89638	4.5657
MA0105.4	NFKB1	3.86422	0.115088	4.25186	3.31e-12	5.36e-11	-2.9525	-2.82886	-2.63151	3.51436	4.87172	4.19304
MA1601.1	ZNF75D	3.84203	1.26212	4.64435	4.61e-12	6.94e-11	-4.72307	0.692845	-3.08532	4.21391	2.99714	3.60552
MA0710.1	NOTO	3.75943	1.03476	4.65204	1.55e-11	2.1e-10	2.48115	-5.58065	1.14752	-2.16543	3.64316	0.738862
MA0018.4	CREB1	3.54474	0.947531	4.70436	3.19e-10	3.55e-09	-2.14866	-0.495471	-4.2674	5.12695	1.01093	3.06894
MA0506.1	NRF1	3.43078	1.28001	4.39235	1.47e-09	1.42e-08	4.12153	-2.58038	-4.50433	1.66791	0.666298	1.1671
MA0655.1	JDP2	3.40709	0.904886	4.56473	2e-09	1.84e-08	0.773222	-1.07323	-5.88672	3.02761	1.25914	2.14337
MA0886.1	EMX2	3.25054	0.912388	4.05133	1.47e-08	1.17e-07	2.03611	-4.91105	0.963727	-1.79043	3.1506	0.680088
MA0062.3	GABPA	3.21659	0.868343	4.28989	2.24e-08	1.7e-07	-0.35014	1.69993	-5.22386	3.33957	-0.198168	1.5707
MA1632.1	ATF2	3.17014	0.882283	4.29239	3.94e-08	2.9e-07	-1.54419	-0.643053	-4.07456	4.48771	0.901077	2.69439
MA0035.4	GATA1	3.15695	0.809277	4.23154	4.62e-08	3.34e-07	-0.637972	1.64552	-4.85707	3.60601	0.401491	2.00375
MA0761.2	ETV1	3.14946	0.430549	4.08517	5.05e-08	3.62e-07	0.61927	1.57327	-5.59926	2.35935	0.204122	1.28173
MA1580.1	ZBTB32	3.12035	1.05293	3.59658	7.15e-08	4.81e-07	-3.19645	2.83457	-2.82999	3.54894	0.480136	2.01454
MA1112.2	NR4A1	3.10768	0.936784	3.85864	8.3e-08	5.53e-07	-0.99124	-2.93393	-3.37002	3.95808	1.61545	2.78676
MA0764.2	ETV4	3.08252	0.0459342	3.51091	1.12e-07	7.24e-07	-2.16934	2.41532	-3.89758	2.52546	2.50589	2.51567
MA0658.1	LHX6	3.00865	0.532496	3.88805	2.62e-07	1.6e-06	1.59599	-5.3164	0.823713	-0.869302	2.12204	0.626369
MA0816.1	Ascl2	2.96193	0.240175	3.78246	4.45e-07	2.61e-06	1.46841	-5.65133	1.02707	0.183509	0.884245	0.533877
MA1625.1	Stat5b	2.9425	1.0891	3.5332	5.52e-07	3.17e-06	-2.31056	0.478068	-3.08991	2.46649	3.7079	3.08719
MA0625.1	NFATC3	2.87046	0.664838	3.38358	1.22e-06	6.63e-06	-1.99655	-1.12556	-3.00307	2.58586	3.46426	3.02506
MA0112.3	ESR1	2.87068	0.535164	3.96542	1.22e-06	6.63e-06	-1.02812	0.380904	-3.51791	4.40445	0.0333737	2.21891
MA0089.2	NFE2L1	2.85917	0.699682	3.54491	1.38e-06	7.44e-06	-1.92008	1.12538	-4.02812	2.95304	1.6756	2.31432
MA0468.1	DUX4	2.83633	0.937735	3.72012	1.76e-06	9.37e-06	-2.23648	-0.15276	-2.28671	1.28949	4.53032	2.9099
MA1646.1	OSR2	2.83465	0.618534	3.3583	1.79e-06	9.44e-06	-1.35589	-1.52297	-2.80984	2.52713	3.70967	3.1184
MA1496.1	HOXA4	2.83086	0.552764	3.37963	1.86e-06	9.73e-06	-1.31541	-2.31819	-2.83269	3.66871	1.90437	2.78654
MA1153.1	Smad4	2.81518	0.755998	3.63199	2.2e-06	1.14e-05	-1.29775	0.392712	-4.353	2.83775	1.72024	2.279
MA0661.1	MEOX1	2.81058	0.356787	3.60863	2.31e-06	1.15e-05	1.66091	-4.91074	0.890079	-1.33971	1.71092	0.185608
MA0734.2	GLI2	2.80057	0.786314	3.51199	2.57e-06	1.25e-05	-1.95488	0.733032	-3.35504	3.44558	2.00997	2.72778
MA1546.1	PAX3(var.2)	2.77809	0.744322	3.31517	3.25e-06	1.57e-05	0.207732	2.58599	-3.63497	2.41767	-2.27603	0.0708196
MA0887.1	EVX1	2.74903	0.744938	3.78058	4.4e-06	2.08e-05	0.961811	-3.89153	0.131047	-0.836305	3.6665	1.4151
MA0598.3	EHF	2.74112	0.510766	3.50499	4.77e-06	2.24e-05	1.47679	1.02106	-4.42778	2.40932	-1.23978	0.584768
MA0492.1	JUND(var.2)	2.70618	1.00052	3.52965	6.81e-06	3.06e-05	-1.18462	-0.199489	-4.04688	2.98804	1.63561	2.31183
MA0519.1	Stat5a::Stat5b	2.70502	0.749536	3.26273	6.89e-06	3.08e-05	-1.80098	-0.831042	-2.63957	2.1587	3.71198	2.93534
MA0879.1	Dlx1	2.6964	0.511802	3.48101	7.52e-06	3.32e-05	1.61258	-4.57808	0.826474	-0.822193	2.07843	0.628121
MA0606.1	NFAT5	2.67921	0.294247	2.91212	8.94e-06	3.9e-05	-1.59304	-1.7467	-2.3492	2.8074	3.1201	2.96375
MA0795.1	SMAD3	2.67646	0.766297	3.24216	9.19e-06	3.99e-05	-2.99617	0.438611	-2.4274	3.19617	1.83767	2.51692
MA1131.1	FOSL2::JUN(var.2)	2.66195	0.137857	3.66336	1.06e-05	4.53e-05	0.306031	0.0543389	-4.72878	2.48583	0.390059	1.43795
MA0748.2	YY2	2.65885	0.785871	3.58224	1.1e-05	4.59e-05	2.99672	0.412791	-4.11485	1.08722	-1.05002	0.0185989
MA0624.1	NFATC1	2.64226	0.765637	2.97783	1.29e-05	5.35e-05	-2.29056	-0.731255	-2.54745	2.56197	3.0152	2.78859
MA0501.1	MAF::NFE2	2.63513	0.855505	3.32229	1.38e-05	5.71e-05	-1.60725	0.434256	-3.71504	2.84621	1.76539	2.3058
MA0075.3	PRRX2	2.63256	0.285011	3.1097	1.42e-05	5.79e-05	1.9793	-3.6355	1.46739	-1.93847	2.16248	0.112005
MA0726.1	VSX2	2.63256	0.285011	3.1097	1.42e-05	5.79e-05	1.9793	-3.6355	1.46739	-1.93847	2.16248	0.112005
MA1126.1	FOS::JUN(var.2)	2.60715	1.02998	3.39372	1.82e-05	7.38e-05	-0.375454	-1.47402	-3.45355	3.32813	1.39266	2.36039
MA0489.1	JUN(var.2)	2.58422	1.16259	3.36531	2.27e-05	9.06e-05	-0.628364	-0.929897	-3.80455	1.87944	2.74851	2.31398
MA0888.1	EVX2	2.5822	0.553894	3.58626	2.32e-05	9.14e-05	0.65822	-3.71746	0.191404	-0.698396	3.44914	1.37537
MA0490.2	JUNB	2.55076	0.651559	3.13055	3.13e-05	0.000120878	0.527722	-2.10363	-3.8067	1.68575	2.11833	1.90204
MA0894.1	HESX1	2.4805	0.65744	3.23057	6.02e-05	0.000224608	2.20015	-4.16809	0.236589	-0.966362	1.33414	0.183888
MA1145.1	FOSL2::JUND(var.2)	2.46649	0.693729	3.19541	6.84e-05	0.000248287	0.286097	-0.821441	-4.02253	2.25786	1.55267	1.90526
MA0612.2	EMX1	2.46631	0.762719	3.27099	6.86e-05	0.000248287	0.379597	-3.85617	1.13413	-0.972858	2.67683	0.851986
MA0900.2	HOXA2	2.46631	0.762719	3.27099	6.86e-05	0.000248287	0.379597	-3.85617	1.13413	-0.972858	2.67683	0.851986
MA0904.2	HOXB5	2.46631	0.762719	3.27099	6.86e-05	0.000248287	0.379597	-3.85617	1.13413	-0.972858	2.67683	0.851986
MA1495.1	HOXA1	2.46631	0.762719	3.27099	6.86e-05	0.000248287	0.379597	-3.85617	1.13413	-0.972858	2.67683	0.851986
MA1139.1	FOSL2::JUNB(var.2)	2.46412	0.518927	3.31645	6.99e-05	0.00025206	0.0788466	-0.245813	-4.2366	2.33185	1.02627	1.67906
MA0514.1	Sox3	2.44886	0.474148	2.95606	8.03e-05	0.000286738	-0.975075	-1.86525	-2.26012	1.71558	3.3921	2.55384
MA0605.2	ATF3	2.40841	0.796891	3.16555	0.000115402	0.000406546	-0.329081	-0.270009	-4.04481	2.14928	1.4966	1.82294
MA0656.1	JDP2(var.2)	2.4005	0.527207	3.22875	0.000123769	0.000431456	-0.30697	-0.0898288	-4.12425	2.31093	0.955204	1.63307
MA1563.1	SOX18	2.36406	0.47554	2.63644	0.000170296	0.000582755	-2.629	1.08096	-2.19422	2.31847	2.03987	2.17917
MA0158.2	HOXA5	2.35392	0.408521	2.62742	0.000185932	0.000630478	-1.36983	-2.33366	-1.49061	2.30649	2.70301	2.50475
MA1142.1	FOSL1::JUND	2.33322	0.377694	2.68772	0.000222114	0.000743034	0.983579	-2.29475	-3.25805	1.28865	1.90873	1.59869
MA0473.3	ELF1	2.32282	0.537169	2.95694	0.000242701	0.000801129	0.673527	1.2178	-3.74738	2.1611	-1.01654	0.572279
MA0036.3	GATA2	2.31928	0.834635	2.88045	0.000250116	0.000821966	-1.19224	2.46451	-2.98002	2.27894	0.33159	1.30526
MA0056.2	MZF1	2.31018	0.709246	2.86751	0.000270165	0.000883962	-2.72649	-0.0658019	-1.14056	2.10111	2.90228	2.5017
MA0793.1	POU6F2	2.3055	0.578167	3.0001	0.00028105	0.000910824	1.75673	-3.70159	0.493876	-1.01243	1.81354	0.400552
MA0482.2	GATA4	2.29198	0.535616	2.87903	0.000314845	0.00100374	-0.928754	1.7482	-3.4067	2.2228	0.760838	1.49182
MA0902.2	HOXB2	2.28804	0.13482	3.22918	0.000325393	0.00102857	0.0827148	-3.43051	-0.24414	0.00891486	3.02774	1.51833
MA0496.3	MAFK	2.28005	0.538994	2.57244	0.000347814	0.00109021	-2.03543	0.894717	-2.59623	2.25985	2.01533	2.13759
MA0144.2	STAT3	2.27308	0.943959	2.88072	0.000368513	0.00115025	-2.3601	1.18384	-1.51257	1.0498	3.29459	2.1722
MA1525.1	NFATC4	2.25114	0.40638	2.57301	0.000441574	0.00135562	-1.15625	-1.69005	-2.432	2.09449	2.42702	2.26075
MA1104.2	GATA6	2.24926	1.0264	2.81924	0.000448435	0.00137104	-0.290885	2.43891	-3.19552	1.90337	-0.617259	0.643058
MA0081.2	SPIB	2.24457	0.917098	2.94862	0.000465972	0.00141884	-0.298379	-0.274737	-3.45208	2.22217	1.77007	1.99612
MA0705.1	Lhx8	2.24269	0.60025	2.8261	0.00047317	0.0014349	0.609139	-3.57689	1.26335	-1.09066	2.06732	0.488329
MA1530.1	NKX6-3	2.2416	0.206463	2.82238	0.000477389	0.00144183	1.51781	-3.85436	1.04955	-1.01273	1.05845	0.0228569
MA0739.1	Hic1	2.23849	0.796174	2.98234	0.000489635	0.00147285	-1.06722	0.568478	-3.20257	2.71639	0.972673	1.84453
MA1132.1	JUN::JUNB	2.23467	0.62251	2.5723	0.000505121	0.00151333	1.86886	-2.21953	-2.84885	0.439605	1.84751	1.14356
MA1500.1	HOXB6	2.23302	1.07048	2.90346	0.00051193	0.0015276	1.90026	-3.40744	-0.500971	-1.09234	1.89015	0.398903
MA0488.1	JUN	2.2202	0.883907	2.93662	0.000567883	0.00168781	-1.43318	0.528883	-2.99392	2.84997	0.583677	1.71682
MA0124.2	Nkx3-1	2.20396	0.919019	2.58195	0.000646937	0.00191514	-1.99967	-0.0610354	-2.35872	2.58338	1.78619	2.18478
MA0787.1	POU3F2	2.20332	0.859837	2.93547	0.000650253	0.00191735	-0.202621	-0.336301	-3.62272	1.84165	1.68225	1.76195
MA0462.2	BATF::JUN	2.18835	0.888837	2.81555	0.000732563	0.00215154	-0.169136	-1.27784	-3.31735	1.86744	1.8006	1.83402
MA1635.1	BHLHE22(var.2)	2.18112	0.412263	2.86864	0.000775636	0.00226025	0.284721	-4.05861	-0.034473	1.1394	1.2554	1.1974
MA1628.1	Zic1::Zic2	2.1796	0.96589	2.79279	0.00078501	0.00227867	-0.465957	-3.33701	-0.885158	2.24043	1.43277	1.8366
MA0152.1	NFATC2	2.17586	0.178834	2.3009	0.000808523	0.0023288	-1.79749	-1.65972	-1.31718	2.26233	2.46962	2.36597
MA1603.1	Dmrt1	2.1682	0.84524	2.70385	0.000858632	0.00246361	-1.27462	-0.0251833	-2.93048	2.26184	1.86483	2.06334
MA0841.1	NFE2	2.16449	0.527364	2.52405	0.000883934	0.00252649	2.08134	-2.56353	-2.50835	0.193776	1.38125	0.787512
MA0835.2	BATF3	2.16369	0.7727	2.70724	0.000889475	0.00253263	0.0677184	-1.66124	-3.20848	1.6204	1.84386	1.73213
MA0080.5	SPI1	2.15289	0.946357	2.73317	0.000967669	0.00271384	-0.834005	-0.562453	-2.79245	1.7973	2.55043	2.17387
MA1572.1	TGIF2LY	2.13087	0.690038	2.84614	0.00114709	0.00318114	-2.49416	-1.1208	-0.668437	3.12938	0.697969	1.91367
MA1130.1	FOSL2::JUN	2.12051	0.866533	2.35915	0.00124174	0.00339318	1.98545	-2.32174	-2.34234	-0.153471	1.82892	0.837726
MA0072.1	RORA(var.2)	2.11804	0.561395	2.59383	0.00126535	0.00344508	0.155965	-1.8884	-2.69555	2.41494	1.18093	1.79793
MA0258.2	ESR2	2.11645	0.444074	2.79872	0.00128084	0.00347456	-1.3264	-0.565625	-2.31938	3.24649	0.194091	1.72029
MA1651.1	ZFP42	2.10844	0.457101	2.87319	0.00136118	0.00367913	2.53247	-0.00674142	-3.20632	0.827807	-0.677603	0.0751019
MA1141.1	FOS::JUND	2.09385	0.724268	2.33361	0.00151971	0.00407807	1.66003	-2.37059	-2.45739	0.00528954	1.86056	0.932926
MA1508.1	IKZF1	2.09041	0.241308	2.56595	0.00155943	0.00416967	1.08998	1.69899	-3.1536	1.53117	-1.05706	0.237055
MA1557.1	SMAD5	2.0875	0.857711	2.74022	0.0015938	0.00424634	-2.63231	0.463956	-1.22561	2.77767	1.05203	1.91485
MA0132.2	PDX1	2.08337	0.622997	2.82379	0.00164381	0.00434852	0.904766	-3.17267	-0.478855	-0.497429	2.47373	0.988149
MA0893.2	GSX2	2.07282	0.186625	2.8982	0.00177829	0.00465476	-0.00861584	-2.58455	-0.46482	-0.138932	3.20483	1.53295
MA0041.1	Foxd3	2.06523	0.888719	2.39542	0.00188112	0.0049067	-1.74346	-0.120884	-2.31736	2.14308	2.0109	2.07699
MA0027.2	EN1	2.06314	0.804606	2.64773	0.00191051	0.00496598	1.34966	-3.02999	-0.0113867	-1.03977	2.23426	0.597243
MA1634.1	BATF	2.06038	0.807285	2.63804	0.0019497	0.00505027	-0.102554	-1.2987	-3.09543	1.68127	1.7601	1.72068
MA1520.1	MAF	2.05971	0.515568	2.71292	0.00195936	0.00505774	-1.26946	-0.141598	-2.02647	3.35149	-0.0541188	1.64869
MA0752.1	ZNF410	2.03412	0.713402	2.39945	0.0023628	0.00597508	-1.63666	0.28674	-2.4994	2.11493	1.75206	1.9335
MA0099.3	FOS::JUN	2.03016	0.623579	2.47789	0.00243152	0.00610746	2.31776	-1.67355	-2.63689	-0.277736	1.22538	0.473821
MA0903.1	HOXB3	2.02658	0.201789	2.53526	0.00249538	0.00622593	1.07588	-3.43021	0.928473	-0.880881	1.42222	0.270667
MA1100.2	ASCL1	2.02517	0.18261	2.7473	0.00252095	0.00626877	1.62996	-3.75554	-0.108312	0.155368	0.408118	0.281743
MA0476.1	FOS	2.016	0.717588	2.50045	0.00269301	0.00660851	0.106643	-1.49177	-2.83639	1.26868	2.12217	1.69542
MA1134.1	FOS::JUNB	1.9982	0.54693	2.35383	0.00305814	0.00745546	1.37928	-2.0372	-2.29505	0.149783	2.17003	1.15991
MA0477.2	FOSL1	1.99495	0.632498	2.47877	0.00312932	0.00760414	0.704441	-1.74883	-2.75584	0.690803	2.11875	1.40478
MA1571.1	TGIF2LX	1.9919	0.627219	2.61266	0.00319769	0.00774506	-2.30235	-1.16669	-0.579548	2.86586	0.827581	1.84672
MA0491.2	JUND	1.98814	0.133841	2.39295	0.00328379	0.00790228	1.00914	-1.58389	-3.1545	1.00948	1.30851	1.159
MA1127.1	FOSB::JUN	1.98746	0.595518	2.59049	0.00329965	0.0079149	0.0687405	-1.01852	-3.10981	2.04311	1.04879	1.54595
MA1491.1	GLI3	1.98403	0.767806	2.5814	0.00338047	0.00804252	-0.737918	0.0579674	-2.61215	2.51376	1.46624	1.99
MA0812.1	TFAP2B(var.2)	1.98383	0.454375	2.60062	0.00338519	0.00804252	1.46656	-3.61201	-0.562648	0.182848	0.864152	0.5235
MA1497.1	HOXA6	1.97811	0.676386	2.59094	0.00352394	0.00834558	0.404024	-2.86631	1.14834	-0.839525	2.29196	0.726219
MA1128.1	FOSL1::JUN	1.9774	0.626231	2.1903	0.00354171	0.00836112	1.58821	-2.25015	-2.40343	0.156821	1.6097	0.883261
MA1137.1	FOSL1::JUNB	1.96331	0.376148	2.25363	0.00390768	0.00913834	1.23148	-2.0948	-2.38257	0.532716	1.91823	1.22547
MA1633.1	BACH1	1.96243	0.302159	2.25944	0.00393164	0.00916564	-1.58035	1.08485	-2.3714	1.77659	1.74223	1.75941
MA0884.1	DUXA	1.96171	0.337458	2.59101	0.00395135	0.00918289	-1.51353	-0.93707	-0.320959	-0.108934	3.49055	1.69081
MA0137.3	STAT1	1.95516	0.534652	2.18059	0.00413493	0.00957968	-1.66146	1.97743	-1.91197	0.83813	2.15718	1.49766
MA0839.1	CREB3L1	1.9421	0.407116	2.57179	0.00452405	0.0103508	0.976206	0.18031	-3.34662	1.71957	-0.105335	0.807116
MA0640.2	ELF3	1.93966	0.250103	2.47546	0.00460037	0.010463	0.855407	1.21576	-3.18026	1.56273	-0.53331	0.51471
MA0646.1	GCM1	1.92411	0.727212	2.48959	0.00511478	0.0115276	0.106494	-1.23017	-2.81867	2.14469	0.941356	1.54302
MA0885.1	Dlx2	1.92296	0.689702	2.58317	0.00515454	0.0115822	0.90468	-2.71462	-0.773096	-0.0662658	2.4514	1.19257
MA1538.1	NR2F1(var.3)	1.91581	0.392062	2.18766	0.00540992	0.0121195	-1.29183	-0.79043	-1.89646	2.06274	2.13204	2.09739
MA0469.3	E2F3	1.9089	0.73247	2.43728	0.00566727	0.012658	0.0159584	0.893836	-1.65433	2.53169	-2.15819	0.186751
MA0834.1	ATF7	1.90696	0.367208	2.53451	0.00574154	0.0127856	0.84675	-0.0451554	-3.35276	1.65075	0.0572639	0.854005
MA1136.1	FOSB::JUNB(var.2)	1.90261	0.264803	2.46575	0.00591159	0.0131206	1.30463	-0.446206	-3.40615	0.869157	0.65601	0.762583
MA1138.1	FOSL2::JUNB	1.89642	0.288642	2.10513	0.00616074	0.0135573	1.52251	-2.04904	-2.50344	0.592361	1.24006	0.916212
MA0131.2	HINFP	1.88369	0.808985	2.36061	0.00670351	0.0146223	-0.154914	-1.12196	-2.63557	2.02856	1.37846	1.70351
MA0814.2	TFAP2C(var.2)	1.88397	0.567191	2.54486	0.00669093	0.0146223	2.2617	-2.81954	-0.980153	0.0339994	0.583146	0.308573
MA0723.1	VAX2	1.86867	0.658078	2.51502	0.00739905	0.0159991	0.727592	-2.86229	-0.853606	-0.0330606	2.1597	1.06332
MA0912.2	HOXD3	1.86867	0.658078	2.51502	0.00739905	0.0159991	0.727592	-2.86229	-0.853606	-0.0330606	2.1597	1.06332
MA0066.1	PPARG	1.86586	0.529542	2.52899	0.0075358	0.0162477	-0.235024	-1.00659	-2.65927	2.39785	0.490756	1.4443
MA0783.1	PKNOX2	1.85911	0.460243	2.25317	0.00787472	0.0169295	-1.26024	-2.10053	-0.914095	2.24532	1.42179	1.83356
MA1629.1	Zic2	1.85847	0.29692	2.47612	0.00790705	0.0169502	0.20868	-3.29103	1.60771	-0.0301097	0.697176	0.333533
MA0738.1	HIC2	1.85526	0.694884	2.41073	0.00807388	0.0172582	-1.56063	0.580642	-1.89107	2.7237	-0.122732	1.30049
MA0797.1	TGIF2	1.85215	0.405435	2.3965	0.0082378	0.0175583	-1.84463	-1.36964	-0.704394	2.7575	0.631895	1.6947
MA1140.2	JUNB(var.2)	1.84883	0.276129	2.41955	0.00841643	0.0178879	0.865643	0.0411913	-3.31234	1.37058	0.392556	0.881568
MA0596.1	SREBF2	1.83797	0.675829	2.1558	0.00902506	0.0189653	-1.48176	2.24561	-1.88192	1.65739	0.404676	1.03103
MA0609.2	CREM	1.83708	0.718331	2.38285	0.00907622	0.0190193	1.11367	-0.694295	-3.03942	1.65048	-0.492568	0.578954
MA1485.1	FERD3L	1.83173	0.32602	2.08604	0.00939182	0.0195162	0.745733	-2.15919	-2.0771	1.00247	1.73147	1.36697
MA1592.1	ZNF274	1.82383	0.528322	2.33841	0.00987605	0.0204654	-0.421665	-1.4248	-2.02159	2.61112	0.542914	1.57702
MA0073.1	RREB1	1.82016	0.243333	2.36969	0.0101083	0.0208885	-3.10196	0.563476	0.158193	1.10758	1.43732	1.27245
MA0591.1	Bach1::Mafk	1.81781	0.48116	2.21941	0.0102596	0.0211427	-1.18288	0.54466	-2.4765	1.89039	1.34844	1.61941
MA0597.1	THAP1	1.81514	0.65764	2.36352	0.0104337	0.0213904	-0.0655803	-0.630761	-2.7687	1.94828	1.15804	1.55316
MA0758.1	E2F7	1.81509	0.701801	2.23707	0.0104371	0.0213904	2.02528	-2.33779	-0.536051	-0.899194	1.58759	0.344197
MA0805.1	TBX1	1.81396	0.372619	2.46417	0.0105117	0.0214843	-2.86144	0.879119	0.164145	2.04	-0.120778	0.959613
MA0037.3	GATA3	1.80731	0.428826	2.37223	0.0109604	0.0222185	-0.0297	1.191	-2.84242	1.88435	0.232113	1.05823
MA1622.1	Smad2::Smad3	1.80336	0.491972	2.1936	0.0112348	0.0226518	0.119782	-1.74884	-2.24564	0.941086	2.04117	1.49113
MA1542.1	OSR1	1.77704	0.558729	2.30328	0.013224	0.0263069	-1.19197	-0.616875	-1.97824	2.58936	0.545138	1.56725
MA1593.1	ZNF317	1.77101	0.648396	2.19011	0.0137214	0.0272239	-0.976709	-0.741915	-2.28521	1.53155	1.88237	1.70696
MA0604.1	Atf1	1.76465	0.486192	2.28391	0.0142636	0.0282245	1.27801	0.313741	-2.82266	1.47753	-0.796389	0.340569
MA0109.1	HLTF	1.74773	0.413132	2.39672	0.0158003	0.0309718	-0.510383	0.595259	-2.69776	2.09485	-0.20164	0.946605
MA1144.1	FOSL2::JUND	1.74754	0.503204	1.96134	0.015818	0.0309718	1.48412	-1.8399	-2.19424	0.243729	1.38665	0.81519
MA0788.1	POU3F3	1.74607	0.488789	2.321	0.0159583	0.0311646	-0.185791	0.0366694	-2.70436	1.05259	1.93422	1.4934
MA0796.1	TGIF1	1.74255	0.536004	2.31999	0.0162982	0.0316627	-1.65209	-1.52657	-0.32803	2.64559	0.238544	1.44207
MA0863.1	MTF1	1.74296	0.624372	2.23264	0.0162583	0.0316627	1.87419	-2.57225	-1.09545	0.957315	0.109001	0.533158
MA0029.1	Mecom	1.73587	0.540456	2.32834	0.0169616	0.0326962	-0.907543	-0.316664	-2.1826	2.45558	0.60011	1.52784
MA1108.2	MXI1	1.73587	0.289435	2.13619	0.0169617	0.0326962	0.700008	-1.85239	-1.1615	2.12134	-1.74067	0.190336
MA1533.1	NR1I2	1.7302	0.371249	2.12804	0.0175431	0.0337298	1.16404	-1.15435	-2.60298	0.582973	1.49174	1.03735
MA1624.1	Stat5a	1.72683	0.226851	2.21984	0.0178962	0.0343203	-0.489971	0.685681	-2.88539	1.31125	1.09056	1.20091
MA0785.1	POU2F1	1.71835	0.414807	2.25489	0.0188143	0.0358963	0.302456	-0.701521	-2.9504	1.07029	1.25899	1.16464
MA0485.2	HOXC9	1.7154	0.202372	1.89069	0.0191432	0.0364307	0.964354	-2.37346	-2.00398	1.18659	0.573885	0.880238
MA0048.2	NHLH1	1.70936	0.231571	2.30239	0.0198311	0.0374532	0.213793	-3.02876	1.5342	-0.0549491	0.501141	0.223096
MA0786.1	POU3F1	1.70707	0.148729	2.1957	0.0200983	0.0378619	0.645537	-0.438895	-3.06611	0.992643	0.917078	0.95486
MA1479.1	DMRTC2	1.70633	0.512869	2.12601	0.0201846	0.0379288	-2.08026	1.72083	-0.00764392	1.87906	-0.944011	0.467527
MA0766.2	GATA5	1.70468	0.585409	2.10336	0.0203801	0.0381999	-0.753991	1.88169	-2.29653	1.48799	0.334134	0.911061
MA0772.1	IRF7	1.69159	0.641304	1.93907	0.0219843	0.0406955	-1.34371	-0.143386	-1.6989	1.76868	1.91159	1.84013
MA1135.1	FOSB::JUNB	1.68957	0.474074	2.01552	0.0222413	0.0410693	1.25368	-1.4842	-2.34973	0.30452	1.4697	0.887108
MA0844.1	XBP1	1.68507	0.386294	2.12466	0.0228239	0.042041	0.682634	-1.28856	-2.60934	1.51003	0.616248	1.06314
MA1150.1	RORB	1.66704	0.48493	2.1247	0.0252904	0.0461286	1.15451	-1.09472	-2.68174	1.27986	0.171002	0.725431
MA0515.1	Sox6	1.66616	0.545195	1.89911	0.0254152	0.0462433	-0.444954	-1.66405	-1.96766	1.48489	1.51427	1.49958
MA1548.1	PLAGL2	1.64479	0.36239	2.10554	0.0286468	0.0518702	-2.38488	1.79677	-0.564589	1.25915	0.0970412	0.678097
MA1604.1	Ebf2	1.64411	0.521121	2.01296	0.0287549	0.0519399	-1.94052	-0.775262	-0.455507	1.66036	1.87288	1.76662
MA1478.1	DMRTA2	1.64349	0.246574	1.8719	0.0288544	0.0519937	-0.754746	2.23282	-1.09624	1.50541	-1.35559	0.0749111
MA0693.2	VDR	1.63984	0.5141	1.92864	0.0294431	0.0529153	1.43511	-1.35952	-1.89985	-0.197449	1.79183	0.797192
MA0695.1	ZBTB7C	1.62386	0.502316	1.95569	0.0321459	0.0575081	-0.319688	-1.4429	-1.85714	1.93443	1.11271	1.52357
MA1133.1	JUN::JUNB(var.2)	1.62028	0.680941	2.10525	0.0327801	0.0583627	1.50387	-0.614122	-2.5775	1.13229	-0.271019	0.430634
MA1645.1	NKX2-2	1.61375	0.40569	2.1048	0.0339635	0.0601428	-2.27623	1.16639	-0.499362	1.90707	-0.0424157	0.932329
MA1503.1	HOXB9	1.59992	0.256364	1.82117	0.0365889	0.0643757	0.91203	-2.2364	-1.82675	1.21108	0.338782	0.774932
MA0478.1	FOSL2	1.59911	0.552199	1.90786	0.0367482	0.064504	1.14809	-1.47103	-1.75126	-0.228621	1.91255	0.841965
MA1577.1	TLX2	1.59537	0.693824	1.99434	0.0374897	0.0654972	1.67489	-2.28807	-0.577031	-0.812235	1.13877	0.16327
MA0500.2	MYOG	1.58817	0.107718	2.02406	0.0389536	0.0678957	0.557139	-3.01849	0.790576	0.00328534	0.543279	0.273282
MA0728.1	Nr2f6(var.2)	1.58687	0.114761	2.02364	0.0392225	0.068205	0.808571	-0.319228	-2.69575	1.0854	0.937275	1.01134
MA1655.1	ZNF341	1.58612	0.271363	2.11685	0.0393787	0.0683175	1.43801	-0.217611	-2.77638	0.274935	0.526967	0.400951
MA1657.1	ZNF652	1.57972	0.247413	1.75919	0.0407316	0.0703375	1.69622	-1.62484	-1.3304	-0.77223	1.47017	0.348971
MA0040.1	Foxq1	1.57637	0.48516	2.04998	0.0414536	0.0714188	-2.42843	-0.350137	-0.00116173	1.65707	1.08369	1.37038
MA0840.1	Creb5	1.57213	0.31716	2.06812	0.0423856	0.0728564	0.768296	-0.114367	-2.91906	1.01983	0.0591052	0.539468
MA0122.3	Nkx3-2	1.56612	0.583862	1.92215	0.0437353	0.0750035	-0.516803	-2.12208	-1.0561	1.65147	1.16317	1.40732
MA1501.1	HOXB7	1.56519	0.32538	2.0965	0.0439491	0.0751973	0.496068	-2.72202	0.238574	-0.300872	1.46059	0.579858
MA0495.3	MAFF	1.55566	0.472816	2.11842	0.0461717	0.0782821	-0.772874	0.331723	-2.31801	1.89736	0.266039	1.0817
MA1129.1	FOSL1::JUN(var.2)	1.55461	0.353298	2.06628	0.0464217	0.0785274	1.27488	0.313915	-2.74932	0.617488	-0.446154	0.085667
MA0715.1	PROP1	1.55262	0.516852	2.04607	0.0469005	0.0791578	-0.72303	-2.45879	0.264607	0.666709	1.6242	1.14545
MA1101.2	BACH2	1.54886	0.446705	1.78057	0.0478134	0.0805165	1.6746	-1.69794	-1.51092	-0.500502	1.22707	0.363283
MA0687.1	SPIC	1.54757	0.186771	2.16934	0.0481304	0.0807046	-0.10414	0.0245415	-2.12105	2.21551	-0.445136	0.885189
MA0637.1	CENPB	1.54612	0.0753714	1.9722	0.0484897	0.0811062	0.903319	1.00966	-2.65861	0.796481	-0.162652	0.316915
MA0442.2	SOX10	1.54017	0.715341	1.93819	0.0499851	0.0834203	-0.51312	-0.60749	-2.18084	1.65777	1.18096	1.41937
MA0050.2	IRF1	1.53954	0.325098	2.02227	0.050145	0.0835003	-0.420508	-1.31924	-0.52827	0.242497	2.70518	1.47384
MA1623.1	Stat2	1.5359	0.389445	1.79088	0.0510795	0.0846784	-1.01428	-1.7253	-0.74935	1.73815	1.36999	1.55407
MA0524.2	TFAP2C	1.53327	0.372789	1.78517	0.051764	0.0852449	0.821837	-1.82194	-1.52684	0.5938	1.65542	1.12461
MA1143.1	FOSL1::JUND(var.2)	1.53388	0.45596	2.03321	0.0516044	0.0852449	0.870442	-0.149116	-2.3825	1.68383	-0.381362	0.651234
MA0729.1	RARA	1.52036	0.635288	1.93444	0.0552372	0.0903661	-0.76016	-0.0338916	-2.01201	1.38666	1.64504	1.51585
MA1637.1	EBF3	1.51934	0.270291	1.75745	0.055518	0.090421	-1.55515	-0.646949	-0.950767	1.64441	1.67148	1.65795
MA1529.1	NHLH2	1.51672	0.378004	1.82355	0.0562504	0.0912235	-1.25091	-2.09616	0.354463	1.45478	1.02634	1.24056
MA0518.1	Stat4	1.51426	0.420051	1.77085	0.0569432	0.0921467	-1.69261	1.75515	-1.16685	1.29901	0.532101	0.915553
MA1569.1	TFAP2E	1.51089	0.581391	1.88309	0.0579043	0.0934991	1.7357	-1.39835	-1.99123	0.47866	0.332971	0.405816
MA0117.2	Mafb	1.50365	0.0779578	1.84749	0.0600117	0.0966927	-1.82951	1.6193	-0.562318	1.50402	-0.704649	0.399684
MA0063.2	NKX2-5	1.50027	0.450986	1.84407	0.0610171	0.0981008	-1.07301	0.367443	-1.62418	1.19083	1.9472	1.56901
MA0775.1	MEIS3	1.48834	0.391081	1.73791	0.0646784	0.103319	-1.50654	0.482837	-1.44082	1.69902	1.19685	1.44794
MA0794.1	PROX1	1.4832	0.51399	1.97809	0.0663117	0.105702	-0.864778	0.260238	-1.81353	2.13928	0.345552	1.24241
MA0689.1	TBX20	1.47926	0.316923	1.9249	0.0675838	0.1075	-2.41526	0.731503	-0.0494267	1.41165	0.639778	1.02571
MA0867.2	SOX4	1.47093	0.134387	1.70427	0.0703399	0.111646	-0.901271	-1.22052	-1.17494	1.11087	1.93661	1.52374
MA1505.1	HOXC8	1.46633	0.440789	1.85507	0.0718997	0.113398	0.375581	-2.21421	-1.11328	0.633971	1.43874	1.03635
MA0006.1	Ahr::Arnt	1.46414	0.423096	1.77489	0.0726531	0.114344	1.54383	-0.988299	-1.93437	1.12834	-0.581481	0.273428
MA0528.2	ZNF263	1.4564	0.387544	2.00756	0.0753601	0.118106	-1.7797	0.707775	-0.228203	0.513845	2.21554	1.36469
MA1589.1	ZNF140	1.43306	0.185554	2.00035	0.0840238	0.130587	-0.318556	-0.0888074	-1.81709	0.203992	2.18339	1.19369
MA1487.1	FOXE1	1.43127	0.351547	1.84789	0.0847195	0.131392	-2.237	-0.768453	0.750111	1.38135	0.413592	0.897474
MA0737.1	GLIS3	1.43082	0.376455	1.75982	0.0848941	0.131392	0.821874	-1.14677	-1.83408	1.66353	-0.524875	0.569325
MA0138.2	REST	1.42348	0.374277	1.68273	0.0878016	0.135331	-0.627906	-1.63425	-0.950922	1.17087	1.67106	1.42097
MA1151.1	RORC	1.42192	0.549907	1.73066	0.0884258	0.136012	-0.743578	-0.456014	-1.78665	1.62364	1.22558	1.42461
MA0735.1	GLIS1	1.42089	0.597659	1.82697	0.088842	0.136371	1.83108	-1.50948	-1.50201	0.105205	0.494669	0.299937
MA1518.1	LHX1	1.41951	0.396567	1.63424	0.0894029	0.13695	0.230946	-1.44091	-1.821	0.958313	1.34264	1.15048
MA1418.1	IRF3	1.41024	0.310794	1.8166	0.0932356	0.142237	-0.347614	0.601065	-2.30901	1.31534	0.642854	0.979099
MA0906.1	HOXC12	1.41064	0.504469	1.82158	0.0930691	0.142237	1.52805	-2.10887	-0.980847	-0.0759715	0.639372	0.2817
MA0652.1	IRF8	1.40522	0.603058	1.77272	0.0953635	0.144423	0.27757	-1.48574	-1.37333	0.514714	1.86319	1.18895
MA0882.1	DLX6	1.40504	0.130678	1.75429	0.0954428	0.144423	0.691495	-2.29174	0.861052	-0.663434	1.00792	0.172245
MA0153.2	HNF1B	1.40177	0.492357	1.80195	0.0968516	0.146258	-1.0229	-0.123981	-1.7053	1.85862	0.675165	1.26689
MA0842.2	NRL	1.39554	0.350228	1.67162	0.099574	0.150065	-1.18298	1.08081	-1.28337	1.83458	-0.458129	0.688224
MA1116.1	RBPJ	1.39165	0.539299	1.73997	0.101307	0.152368	-0.719823	-0.44333	-1.74719	1.67833	1.08039	1.37936
MA0830.2	TCF4	1.38916	0.402913	1.71957	0.102428	0.153745	0.87485	-1.79997	-0.827501	1.56717	-0.899034	0.334067
MA0784.1	POU1F1	1.37942	0.378746	1.67	0.106902	0.159818	0.4965	-1.24066	-1.80425	0.636778	1.48368	1.06023
MA1476.1	DLX5	1.37762	0.347705	1.6537	0.107747	0.160478	0.825514	-1.94568	-1.16819	0.36855	1.3037	0.836126
MA0659.2	MAFG	1.37586	0.528029	1.75772	0.108576	0.161029	-1.50822	0.675978	-1.18294	1.85669	-0.0382913	0.909197
MA0911.1	Hoxa11	1.37599	0.488623	1.72142	0.108515	0.161029	1.53831	-1.79145	-1.49983	0.427581	-0.407233	0.0101739
MA1470.1	BACH2(var.2)	1.37375	0.459598	1.73782	0.109579	0.161874	-0.939717	0.777733	-1.49314	1.94744	-0.201137	0.873153
MA0696.1	ZIC1	1.3672	0.176074	1.7982	0.11273	0.165544	0.46801	-2.64775	-0.154365	0.789475	0.109725	0.4496
MA1576.1	THRB(var.3)	1.35458	0.307893	1.80394	0.118995	0.174059	-0.1776	-0.43657	-1.18958	2.13596	-1.12504	0.505461
MA1549.1	POU6F1(var.2)	1.35114	0.331988	1.86717	0.120747	0.175932	-0.408704	-1.97712	0.0214515	0.392451	1.75534	1.0739
MA0627.2	POU2F3	1.32756	0.344799	1.8138	0.133285	0.193032	-0.461823	0.194386	-1.95389	1.66267	0.467064	1.06487
MA0712.2	OTX2	1.32602	0.250151	1.75316	0.13414	0.193557	0.342677	-2.35639	-0.195548	0.381554	1.12996	0.755758
MA0595.1	SREBF1	1.32249	0.540923	1.6772	0.136105	0.196013	-1.52455	1.81365	-0.814478	0.751878	0.512776	0.632327
MA1506.1	HOXD10	1.31991	0.113814	1.79141	0.137552	0.197715	1.0874	-2.44289	-0.00934903	0.252095	0.00565667	0.128876
MA0910.2	HOXD8	1.3189	0.417833	1.63363	0.138127	0.197779	-0.382221	-0.897846	-1.6607	1.59171	0.871681	1.2317
MA1498.1	HOXA7	1.3189	0.417833	1.63363	0.138127	0.197779	-0.382221	-0.897846	-1.6607	1.59171	0.871681	1.2317
MA0057.1	MZF1(var.2)	1.31736	0.524768	1.6895	0.138999	0.198646	-0.6213	-1.82437	0.899912	-0.0581785	1.55392	0.747871
MA0905.1	HOXC10	1.31549	0.202551	1.69372	0.140064	0.199786	0.69913	-2.34216	-0.704576	0.799774	0.329324	0.564549
MA0071.1	RORA	1.31397	0.572209	1.65191	0.140934	0.200642	0.932431	-0.574761	-1.9633	1.26291	-0.683805	0.289551
MA0714.1	PITX3	1.30387	0.325911	1.76318	0.146825	0.208253	-0.25096	-1.45619	-0.495753	0.302059	2.07016	1.18611
MA0676.1	Nr2e1	1.30338	0.445853	1.71495	0.147117	0.208253	0.657089	-0.346754	-2.1825	1.24547	-0.339868	0.4528
MA0615.1	Gmeb1	1.30367	0.427364	1.57139	0.146943	0.208253	1.35045	-0.692318	-1.74363	0.994292	-0.788014	0.103139
MA1499.1	HOXB4	1.28914	0.393037	1.57382	0.155731	0.217151	0.386952	-1.67015	-1.247	1.4018	0.513694	0.957745
MA1504.1	HOXC4	1.28914	0.393037	1.57382	0.155731	0.217151	0.386952	-1.67015	-1.247	1.4018	0.513694	0.957745
MA1507.1	HOXD4	1.28914	0.393037	1.57382	0.155731	0.217151	0.386952	-1.67015	-1.247	1.4018	0.513694	0.957745
MA0631.1	Six3	1.28601	0.543733	1.65723	0.157667	0.219439	0.0452629	0.459629	-1.41617	1.67545	-1.28177	0.19684
MA0690.1	TBX21	1.28149	0.428168	1.66288	0.160506	0.222974	-1.73996	0.75559	-0.733886	1.53731	0.264408	0.900861
MA0593.1	FOXP2	1.27782	0.352909	1.50885	0.162831	0.225366	-1.20701	-0.969078	1.71501	-0.17995	1.09692	0.458485
MA0731.1	BCL6B	1.26857	0.273235	1.71268	0.168797	0.23319	-0.079789	0.693027	-1.88551	0.303986	1.53883	0.921409
MA0142.1	Pou5f1::Sox2	1.25989	0.416754	1.66869	0.174537	0.24023	-1.26632	-0.231182	-1.11274	1.85546	0.249792	1.05262
MA1114.1	PBX3	1.25699	0.335456	1.53017	0.176483	0.242461	-0.83765	1.23353	-0.040751	-0.721346	2.03224	0.655447
MA1502.1	HOXB8	1.24802	0.419076	1.58592	0.182603	0.249949	0.632885	-1.84474	-0.86464	0.264035	1.28992	0.776978
MA1155.1	ZSCAN4	1.24659	0.290149	1.71239	0.183592	0.250842	0.28648	-0.523031	-1.98787	1.42973	-0.031233	0.699247
MA0870.1	Sox1	1.24601	0.410037	1.50097	0.183995	0.250933	1.36366	-1.62837	-1.05361	-0.113804	0.808526	0.347361
MA0774.1	MEIS2	1.24058	0.150728	1.53458	0.187787	0.255638	-1.02189	-1.23253	-0.866092	1.67123	0.485277	1.07825
MA1539.1	NR2F6(var.3)	1.20942	0.390499	1.61122	0.210572	0.28398	-0.209094	0.0742809	-1.65087	0.832392	1.56809	1.20024
MA1594.1	ZNF382	1.209	0.0095824	1.49573	0.210891	0.28398	0.601588	0.487621	-2.13877	0.582455	0.57963	0.581043
MA1419.1	IRF4	1.19242	0.291277	1.57622	0.223735	0.299652	0.250275	-0.0455264	-0.791176	-0.644501	2.1823	0.768902
MA0467.1	Crx	1.18291	0.399242	1.58994	0.231327	0.307611	-0.51006	0.270159	-1.43279	0.550788	1.72649	1.13864
MA0810.1	TFAP2A(var.2)	1.17139	0.33266	1.55568	0.240729	0.318411	1.72071	-0.70101	-1.3652	-0.26617	0.341182	0.037506
MA1154.1	ZNF282	1.16977	0.320446	1.5456	0.242077	0.319133	0.843394	-0.118118	-1.91519	0.190851	1.0217	0.606277
MA0792.1	POU5F1B	1.16716	0.250972	1.30414	0.244246	0.321354	0.800134	-1.33192	-1.55807	0.231655	0.866234	0.548944
MA0150.2	Nfe2l2	1.15291	0.211322	1.38688	0.256309	0.336631	-0.754917	0.636579	-1.5536	1.15912	0.7733	0.96621
MA1584.1	ZIC5	1.15085	0.337926	1.56855	0.258082	0.338364	-0.514748	-1.46355	-0.0172742	0.310011	1.67167	0.990843
MA0769.2	TCF7	1.14705	0.358831	1.56214	0.261367	0.34207	1.52042	-0.381025	-1.58841	0.450818	-0.315347	0.0677353
MA1152.1	SOX15	1.14326	0.373629	1.55045	0.26468	0.345799	-0.138971	-1.57603	-0.496134	0.416298	1.52323	0.969766
MA1547.1	PITX2	1.12442	0.433281	1.42411	0.281468	0.365124	-0.106758	-1.4593	-0.668237	0.738265	1.3882	1.06323
MA0711.1	OTX1	1.12393	0.312797	1.5065	0.281919	0.365124	-0.0584636	-0.73919	-1.38401	1.62721	0.00541047	0.816308
MA0517.1	STAT1::STAT2	1.11081	0.236273	1.33874	0.293967	0.379411	0.57125	-0.940604	-1.51153	1.08027	0.535642	0.807954
MA0891.1	GSC2	1.1011	0.354424	1.35643	0.303067	0.39048	0.0494021	-1.30617	-0.743912	0.785046	1.4067	1.09587
MA1639.1	MEIS1(var.2)	1.09781	0.352623	1.44337	0.306193	0.393299	-0.0646806	-0.930109	-0.177383	1.48857	-1.39109	0.0487421
MA0629.1	Rhox11	1.0843	0.393812	1.46039	0.319174	0.407711	-0.482502	-0.301241	-1.5089	1.38741	0.465083	0.926244
MA0864.2	E2F2	1.08233	0.152607	1.48793	0.32109	0.409458	1.11804	-1.85189	-0.0193321	-0.161647	0.25727	0.0478112
MA1585.1	ZKSCAN1	1.07002	0.0956763	1.45777	0.33319	0.423441	0.0517888	0.321408	-1.81472	0.171639	1.0764	0.624018
MA0480.1	Foxo1	1.06861	0.398445	1.29048	0.334591	0.424498	-1.07492	0.112544	-0.955737	0.840001	1.33949	1.08975
MA0736.1	GLIS2	1.06083	0.284518	1.43217	0.342375	0.432168	0.346339	-1.83205	-0.362984	1.02923	-0.253667	0.387784
MA0682.2	PITX1	1.05942	0.339603	1.17178	0.343794	0.433227	0.916437	-1.22293	-1.22809	0.843924	0.0845481	0.464236
MA0463.2	BCL6	1.05159	0.257431	1.232	0.351734	0.44174	1.21105	-1.1596	-0.30393	-0.689597	1.02246	0.166429
MA0872.1	TFAP2A(var.3)	1.04956	0.231193	1.3354	0.3538	0.443588	-0.289894	0.840748	-1.48339	1.1491	0.41865	0.783873
MA1575.1	THRB(var.2)	1.03897	0.381321	1.36336	0.364695	0.456481	-0.66661	-1.35751	-0.189422	1.32909	0.506772	0.91793
MA1147.1	NR4A2::RXRA	1.0366	0.219767	1.27683	0.367157	0.458793	0.832808	1.1455	-1.34636	-0.532042	0.523906	-0.00406783
MA0845.1	FOXB1	1.03514	0.193052	1.22718	0.368677	0.459922	-1.1754	1.1057	-0.338662	1.04411	-0.691126	0.176492
MA1652.1	ZKSCAN5	1.03411	0.213728	1.3061	0.369748	0.460488	-0.4355	0.512426	-1.54628	1.02848	0.618758	0.823619
MA1532.1	NR1D2	1.0256	0.172886	1.19982	0.378665	0.469243	-0.507153	-0.909292	0.929147	-0.542254	1.41257	0.43516
MA0108.2	TBP	1.018	0.34488	1.29088	0.386697	0.476819	0.734868	-0.528311	-1.38755	0.197687	1.16994	0.683815
MA0744.2	SCRT2	1.00753	0.148382	1.25652	0.397886	0.489633	0.409267	-0.806239	-1.07715	1.34571	-0.619345	0.363182
MA0100.3	MYB	1.00705	0.320324	1.34277	0.398401	0.489633	1.24848	-0.394473	-1.43117	0.107558	0.532213	0.319885
MA0811.1	TFAP2B	0.998877	0.247367	1.18008	0.407222	0.498122	1.11086	-1.16309	-0.977269	0.154601	0.659231	0.406916
MA1562.1	SOX14	0.998795	0.342045	1.24546	0.407311	0.498122	-0.0100496	1.09387	-1.39391	0.684255	-0.628895	0.0276801
MA1627.1	Wt1	0.997926	0.228272	1.2995	0.408254	0.498457	-1.50452	-0.214671	1.05221	0.295762	0.708426	0.502094
MA0782.2	PKNOX1	0.996527	0.228496	1.31611	0.409772	0.499493	-0.613976	0.308009	-0.0429342	-0.525096	1.84724	0.661073
MA1600.1	ZNF684	0.988969	0.214553	1.16864	0.418014	0.50788	-0.989161	-0.546804	1.20449	-0.155086	1.11283	0.478873
MA0084.1	SRY	0.98263	0.234264	1.34936	0.42497	0.515492	0.179967	-1.69638	-0.325423	1.00227	-0.359525	0.321373
MA0648.1	GSC	0.976088	0.282922	1.10124	0.43219	0.523398	0.169171	-1.00365	-1.0854	0.978755	0.801805	0.89028
MA0672.1	NKX2-3	0.97128	0.127725	1.25197	0.43752	0.528995	0.49531	0.0380795	-1.74024	0.32368	0.636939	0.480309
MA1421.1	TCF7L1	0.965696	0.299554	1.28564	0.443738	0.535645	0.96477	-1.55355	-0.491546	0.286053	0.326126	0.306089
MA1581.1	ZBTB6	0.963797	0.236899	1.13278	0.445858	0.537335	-1.06974	-0.540016	-0.392793	0.926985	1.12542	1.0262
MA0847.2	FOXD2	0.944839	0.267008	1.14162	0.467182	0.559376	-1.10275	0.530512	0.232313	1.1335	-0.85755	0.137977
MA0525.2	TP63	0.937051	0.30587	1.16957	0.476017	0.568174	-1.15422	0.968833	-0.523424	0.993284	0.0350151	0.51415
MA0111.1	Spz1	0.935392	0.289061	1.14787	0.477904	0.569515	-0.10327	-1.11415	1.17765	-0.467794	0.812889	0.172547
MA0069.1	PAX6	0.927905	0.0372532	1.25016	0.48644	0.577841	-0.170149	-0.74353	-0.0805634	-0.123362	1.70579	0.791215
MA0914.1	ISL2	0.915878	0.348148	1.14148	0.500214	0.591378	0.608765	-0.598547	0.179935	-1.03214	1.24982	0.108837
MA0869.1	Sox11	0.904666	0.27685	1.12337	0.513113	0.604712	0.0739102	0.423058	-1.1593	1.04211	-0.837345	0.102384
MA1561.1	SOX12	0.895899	0.245901	1.16762	0.52323	0.614692	-0.459823	0.10712	-0.548988	1.30837	-1.02514	0.141611
MA1125.1	ZNF384	0.890861	0.119034	1.1435	0.529054	0.620557	0.525993	-1.54545	0.289281	-0.396863	0.573977	0.0885571
MA0155.1	INSM1	0.886109	0.304825	1.16618	0.534553	0.625042	-1.24867	0.46638	-0.401798	1.06705	0.26111	0.664081
MA0498.2	MEIS1	0.885345	0.128091	1.00726	0.535437	0.625096	-0.722788	0.871814	-1.02827	0.518247	0.746053	0.63215
MA0779.1	PAX1	0.884605	0.310818	1.16103	0.536294	0.625117	-0.408645	0.345052	-0.47998	1.18689	-1.11805	0.0344218
MA1607.1	Foxl2	0.880546	0.201601	1.18295	0.540994	0.628632	-0.868266	0.0318387	0.33671	-0.336232	1.48469	0.574227
MA0800.1	EOMES	0.880768	0.255754	1.14534	0.540737	0.628632	-1.03682	-0.0622597	0.263607	1.24892	-0.636226	0.306347
MA0781.1	PAX9	0.877167	0.167109	1.01867	0.54491	0.632197	-0.55232	0.761215	-0.907422	1.06631	-0.485291	0.290511
MA1521.1	MAFA	0.865473	0.32826	1.13746	0.558465	0.644915	0.468413	-0.265598	-1.23182	1.02614	-0.412835	0.306655
MA0790.1	POU4F1	0.864387	0.235749	1.04828	0.559725	0.645371	-0.15473	0.551179	-1.03537	0.981596	-0.819017	0.0812893
MA0078.1	Sox17	0.862671	0.259073	1.06876	0.561715	0.646665	-0.304627	-0.765084	-1.08486	1.01535	0.435652	0.725501
MA0815.1	TFAP2C(var.3)	0.858525	0.242593	1.10076	0.56652	0.651193	-0.26937	0.293149	-1.21494	0.900925	0.736061	0.818493
MA0813.1	TFAP2B(var.3)	0.854423	0.141021	1.09519	0.571275	0.65464	-0.0901683	0.497962	-1.34378	0.805792	0.483757	0.644775
MA1531.1	NR1D1	0.850587	0.262561	1.15403	0.575719	0.658722	-1.10903	0.166604	-0.422203	1.19642	0.163173	0.679797
MA0087.1	Sox5	0.845899	0.256859	1.09864	0.581148	0.663915	0.639144	-1.53621	-0.39918	0.368783	-0.102337	0.133223
MA1124.1	ZNF24	0.841854	0.270608	1.14054	0.585828	0.666201	-1.0398	1.22946	0.357101	-0.16432	0.489552	0.162616
MA0683.1	POU4F2	0.835466	0.245857	1.05833	0.593212	0.67252	-0.489087	0.49534	-1.1436	0.944211	0.334838	0.639524
MA1541.1	NR6A1	0.835152	0.159428	1.134	0.593575	0.67252	0.854598	0.0186397	-1.39847	0.309714	-0.208804	0.0504548
MA0163.1	PLAG1	0.820785	0.287965	1.09012	0.610134	0.686283	-0.727204	0.183043	-0.0708197	1.26701	-0.723267	0.271869
MA0486.2	HSF1	0.812641	0.128391	0.949485	0.619482	0.694938	-0.0910946	0.6369	-0.894979	0.871309	-0.828366	0.0214714
MA1608.1	Isl1	0.804211	0.33144	1.00238	0.629124	0.702975	0.156065	-0.733895	-0.999843	0.250802	0.991925	0.621363
MA0074.1	RXRA::VDR	0.805123	0.070091	1.03363	0.628083	0.702975	-0.582528	0.0517773	-0.635712	1.28648	-0.46411	0.411184
MA0154.4	EBF1	0.775186	0.26103	0.952964	0.661967	0.735957	-0.781144	-0.787793	0.285417	0.422272	0.956498	0.689385
MA0751.1	ZIC4	0.76899	0.250602	0.936962	0.668892	0.741446	-0.189303	-1.00179	-0.544261	0.827031	0.603597	0.715314
MA0481.3	FOXP1	0.766725	0.357929	1.00267	0.671414	0.743138	-0.560246	0.295071	-0.742553	0.217017	1.17544	0.696227
MA0513.1	SMAD2::SMAD3::SMAD4	0.759969	0.224608	1.02436	0.678911	0.750322	-0.722548	0.361784	-0.0229551	-0.219581	1.3067	0.543558
MA0877.2	BARHL1	0.752804	0.0738029	0.955522	0.68681	0.75681	0.287159	0.46295	-1.36579	0.31432	0.11374	0.21403
MA0883.1	Dmbx1	0.746351	0.234481	0.947249	0.693878	0.76347	-0.319533	0.54251	-1.08257	0.804863	0.112474	0.458669
MA1606.1	Foxf1	0.729189	0.163155	0.907761	0.712439	0.781587	-0.811041	-0.235172	0.683828	-0.158004	0.981706	0.411851
MA1471.1	BARX2	0.710408	0.325717	0.923933	0.732316	0.799864	0.403283	-1.16827	-0.325043	0.622066	-0.375265	0.1234
MA0673.1	NKX2-8	0.693841	0.104698	0.972587	0.74943	0.816167	0.116596	0.976784	-0.966582	0.151782	-0.0886335	0.0315742
MA0038.2	GFI1	0.68939	0.18706	0.846432	0.753955	0.819899	-0.806958	0.870917	-0.418886	0.276106	0.529393	0.40275
MA0106.3	TP53	0.677325	0.132577	0.944263	0.766059	0.831849	-0.209745	-0.961115	0.927049	-0.0583528	0.109331	0.0254892
MA0613.1	FOXG1	0.674212	0.128335	0.896417	0.769142	0.833983	-0.537181	0.0469595	-0.271536	0.00010902	1.22326	0.611685
MA0494.1	Nr1h3::Rxra	0.668905	0.170629	0.909347	0.77436	0.838422	0.757685	-0.113265	-1.06069	0.283763	-0.0782612	0.102751
MA1115.1	POU5F1	0.665783	0.178317	0.880998	0.777406	0.8405	0.414569	0.00680265	-1.0586	0.0189779	0.693764	0.356371
MA0070.1	PBX1	0.644764	0.131722	0.839345	0.797449	0.859064	0.293836	0.594136	-1.07142	0.277886	-0.00428558	0.1368
MA0507.1	POU2F2	0.639904	0.0727417	0.719371	0.801963	0.862053	0.163474	0.53563	-0.741966	0.634632	-0.609158	0.0127366
MA0051.1	IRF2	0.628825	0.0888653	0.845934	0.81208	0.870419	-0.296195	-0.664437	-0.13184	0.978183	-0.347789	0.315197
MA0851.1	Foxj3	0.626725	0.16147	0.81043	0.81397	0.871193	-0.202797	-1.03424	0.572136	0.0749606	0.3702	0.22258
MA1647.1	PRDM4	0.617016	0.217411	0.769165	0.822589	0.877899	0.203379	-0.566451	-0.833678	0.693599	0.118648	0.406123
MA0861.1	TP73	0.607236	0.246314	0.753873	0.83107	0.88442	-0.502643	0.306148	-0.70259	0.786525	0.127907	0.457216
MA0009.2	TBXT	0.598597	0.0377459	0.765164	0.838391	0.888409	-0.355986	-0.185804	-0.401028	0.972844	-0.446646	0.263099
MA0614.1	Foxj2	0.594353	0.109333	0.773692	0.841928	0.890493	-0.931962	0.254295	-0.0640594	0.530517	0.453909	0.492213
MA0077.1	SOX9	0.554642	0.0275151	0.701985	0.87305	0.918612	0.302199	0.259115	-0.967704	0.336652	-0.188736	0.0739583
MA1602.1	ZSCAN29	0.5514	0.153946	0.695357	0.875429	0.919817	0.372422	-0.325365	-0.0442995	-0.599904	0.785397	0.0927466
MA0508.3	PRDM1	0.511852	0.152435	0.668691	0.902437	0.939112	-0.143224	0.113403	-0.722253	0.391711	0.591797	0.491754
MA0140.2	GATA1::TAL1	0.512907	0.146001	0.682431	0.901765	0.939112	0.107485	-0.159273	-0.61723	0.747102	-0.292258	0.227422
MA1630.1	Znf281	0.515605	0.153358	0.654998	0.900036	0.939112	-0.590483	-0.130635	0.708486	-0.159033	0.428494	0.13473
MA0635.1	BARHL2	0.494037	0.17059	0.659011	0.91337	0.94166	-0.631268	0.103081	-0.311117	0.684989	0.0557306	0.37036
MA1654.1	ZNF16	0.470985	0.111204	0.566723	0.926375	0.947977	-0.0642636	-0.306533	0.434905	-0.453304	0.637936	0.0923159
MA0679.2	ONECUT1	0.447213	0.0357417	0.475458	0.938448	0.956397	-0.274005	0.507011	-0.282575	0.510395	-0.359921	0.0752368
MA0047.3	FOXA2	0.409274	0.0609892	0.541461	0.954974	0.970586	-0.308001	-0.15951	-0.0903624	-0.0119801	0.739713	0.363867
MA1597.1	ZNF528	0.349155	0.0923351	0.452669	0.974693	0.983926	-0.100529	-0.259492	-0.416299	0.48234	0.10624	0.29429
MA0719.1	RHOXF1	0.324241	0.0306462	0.364784	0.980762	0.986049	0.25615	-0.431245	-0.313372	0.18576	0.196221	0.190991
MA0619.1	LIN54	0.326379	0.0561092	0.425899	0.980285	0.986049	-0.157451	-0.313848	-0.0697868	0.498664	-0.259892	0.119386
MA0030.1	FOXF2	0.317685	0.10296	0.423448	0.982173	0.986139	-0.253088	-0.249633	-0.0211671	0.0757929	0.521744	0.298768
MA0024.3	E2F1	0.194343	0.0200661	0.267867	0.997287	0.997823	-0.0982886	-0.0422599	-0.06443	0.275066	-0.258715	0.00817573
